# Supplementary material for: Health Risk Assessment of Trace Metals in Various Environmental Media, Crops and Human Hair from a Mining Affected Area
Source: PubMed Central journal article supplement (PMC5751012; doi:10.3390/ijerph14121595), 2017-12-18
Supplement: ijerph-14-01595-s001.pdf [file ijerph-14-01595-s001.pdf]

## Supporting Information

**Table S1.** Soil environmental quality standard (GB15618-2008) and background value (mg·kg<sup>-1</sup>).

(Please add the column heading.)

| Column<br>Heading | pH      | As  | Cd    | Cr   | Cu  | Ni   | Pb | Zn   |
|-------------------|---------|-----|-------|------|-----|------|----|------|
|                   | ≤5.5    | 35  | 0.25  | 120  | 150 | 60   | 50 | 150  |
| GB15618-          | 5.5–6.5 | 30  | 0.3   | 150  | 150 | 70   | 50 | 200  |
| 2008              | 6.5–7.5 | 25  | 0.45  | 200  | 200 | 80   | 50 | 250  |
|                   | >7.5    | 20  | 0.6   | 200  | 200 | 90   | 50 | 300  |
| Background        | 5.2     | 8.9 | 0.056 | 50.5 | 17  | 14.4 | 36 | 47.3 |

**Table S2.** Maximum levels of Contaminants in Foods (GB 2762-2012) (mg·kg<sup>-1</sup>, fresh weight).

| As  | Cd                   | Cr                  | Cu | Ni | Pb                  | Zn |
|-----|----------------------|---------------------|----|----|---------------------|----|
| 0.5 | 0.1 corn             | 1.0 corn            | NR | NR | 0.2 corn            | NR |
|     | 0.2 leaf vegetable   | 0.5 fresh vegetable |    |    | 0.3 leaf vegetable  |    |
|     | 0.1 root vegetable   |                     |    |    | 0.1 fresh vegetable |    |
|     | 0.05 fresh vegetable |                     |    |    |                     |    |

NR: not recommended

**Table S3.** Maximum levels of contaminants in irrigation water (GB5749-2006) (mg·L<sup>-1</sup>).

| As   | Cd   | Cr  | Cu  | Ni  | Pb  | Zn  |
|------|------|-----|-----|-----|-----|-----|
| 0.05 | 0.01 | 0.1 | 1.0 | 0.1 | 0.2 | 2.0 |

**Table S4.** Parameter values in average daily does calculation models of heavy metals. (Please

confirm the unite "d·a<sup>-1</sup>".)

| Item               | Parameter                       | Value                                                        |
|--------------------|---------------------------------|--------------------------------------------------------------|
| ADD <sub>ing</sub> | InR/ mg·d <sup>-1</sup> (soil)  | 200 (children), 100 (adults)                                 |
|                    | InR/ mg·d <sup>-1</sup> (crops) | 232×10 <sup>3</sup> (children), 345×10 <sup>3</sup> (adults) |

|                     |                                              |                                                 |
|---------------------|----------------------------------------------|-------------------------------------------------|
|                     | InR/ L·d <sup>-1</sup> (water)               | 1.0 (children), 2.0 (adults)                    |
|                     | InhR/ m <sup>3</sup> ·d <sup>-1</sup> (soil) | 7.63 (children), 14.7 (adults)                  |
| ADD <sub>inh</sub>  | InhR/ m <sup>3</sup> ·d <sup>-1</sup> (air)  | 8.7 (children), 15.5 (adults)                   |
|                     | PEF/ m <sup>3</sup> ·kg <sup>-1</sup>        | 1.36×10 <sup>9</sup>                            |
|                     | SA/cm <sup>2</sup>                           | 2800 (children), 16000 (adults)                 |
| ADD <sub>derm</sub> | AF/mg·(cm <sup>2</sup> ·d) <sup>-1</sup>     | 0.2 (children), 0.07 (adults)                   |
|                     | ABS                                          | 0.03 (As), 0.001 (other metals)                 |
|                     | ED/a                                         | 6 (children), 24 (adults)                       |
| Exposure pathway    | EF/d·a <sup>-1</sup>                         | 350                                             |
| parameters          | BW/kg                                        | 15.9 (children), 62.0 (adults)                  |
|                     | AT/d                                         | ED×365(non-carcinogens)<br>70×365 (carcinogens) |
|                     | CF/kg·mg <sup>-1</sup>                       | 1×10 <sup>-6</sup>                              |

Note: InhR is the inhalation rate, PEF is the particle emission factor, SA is the surface area of skin exposed to pollutants, AF is the skin adherence factor, ABS is the dermal absorption factor, EF is the exposure frequency, ED is the exposure duration, BW is the body weight, and AT is the average time for non-carcinogens or carcinogens, CF is the units conversion factor.

**Table S5.** References does for non-carcinogen metals and slope factors for carcinogen metals.

| Item                                          | As     | Cd      | Cr       | Cu    | Ni     | Pb      | Zn    |
|-----------------------------------------------|--------|---------|----------|-------|--------|---------|-------|
| RfD <sub>ing</sub> / mg·(kg·d) <sup>-1</sup>  | 0.0003 | 0.001   | 0.003    | 0.04  | 0.02   | 0.0035  | 0.3   |
| RfD <sub>inh</sub> / mg·(kg·d) <sup>-1</sup>  | 0.0003 | 0.001   | 0.000029 | 0.04  | 0.02   | 0.0035  | 0.3   |
| RfD <sub>derm</sub> / mg·(kg·d) <sup>-1</sup> | 0.0012 | 0.00001 | 0.00006  | 0.012 | 0.0054 | 0.00052 | 0.006 |
| SF <sub>ing</sub> / (kg·d)·mg <sup>-1</sup>   | 1.5    | 6.1     |          |       |        |         |       |
| SF <sub>inh</sub> / (kg·d)·mg <sup>-1</sup>   | 0.0043 | 0.38    |          |       |        |         |       |
| SF <sub>derm</sub> / (kg·d)·mg <sup>-1</sup>  | 1.5    | 6.1     |          |       |        |         |       |

### Local webpage

**Website:** <https://news.qq.com/a/20141108/003391.htm>

**Title:** Blood lead poisoning of 16 children in Wengyuan county of Guangdong province due to the companies' pollution emission.

# 广东翁源16名儿童血铅超标 村民称因企业排污

各地新闻 | 南方报业网-南方农村报 王伟正 2014-11-08 03:40 | 我要分享

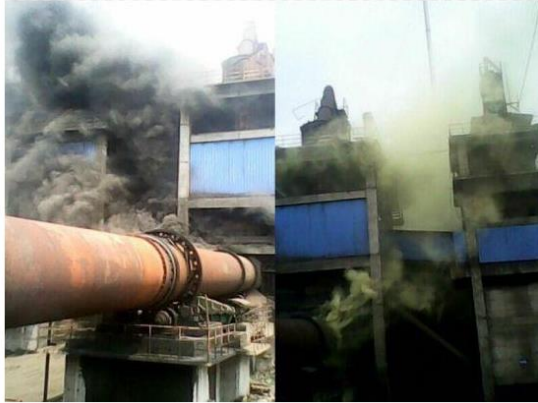

铁龙工厂废气排放

广州金城医学检验中心  
GUANGZHOU KINGMED CENTER FOR CLINICAL LABORATORY  
检验结果报告单

| 项目          | 检测方法   | 结果     | 单位   | 提示 | 参考值                                              |
|-------------|--------|--------|------|----|--------------------------------------------------|
| 全血微量元素 (Pb) | ICP-MS | 287.5  | ug/L | ↑  | 儿童(10-14岁)0-100.0<br>成人(15-64岁)0-40.0            |
| 全血微量元素 (Cu) | ICP-MS | 25.4   | ug/L | ↑  | 0.0-21.0                                         |
| 全血微量元素 (Ca) | ICP-MS | 1111.9 | ug/L |    | 成人(15-64岁)700.0-1200.0<br>儿童(10-14岁)700.0-1200.0 |
| 全血微量元素 (Zn) | ICP-MS | 2.6    | ug/L | ↓  | 儿童(10-14岁)4.0-8.0                                |
| 全血微量元素 (Fe) | ICP-MS | 411.8  | ug/L |    | 成人(15-64岁)300.0-600.0<br>儿童(10-14岁)300.0-600.0   |
| 全血微量元素 (Mg) | ICP-MS | 33.3   | ug/L |    | 20.0-70.0                                        |

建议与解释：  
a. 该报告的解释严格执行《卫生部办公厅关于印发《重金属污染诊疗指南（试行）》的通知》（卫办医政发【2011】171号）；  
b. 儿童血铅≥100 ug/L或成人血铅≥400 ug/L在复查前禁止吸烟、饮用醇制饮料等环境暴露，禁止进行车体维修。  
c. 本检测项目仅用于医学目的，不作为职业健康或中毒诊断的依据。
